# Supplementary material for: Extreme historical droughts and floods in the Hanjiang River Basin, China, since 1426
Source: Copernicus journal article supplement (doi:10.5194/cp-18-1775-2022), 2022-08-03
Supplement: Supplementary file 1 [file cp-18-1775-2022-supplement.zip]

Archive with 3 entries (3 files):
- cp-18-1775-2022-supplement-title-page.pdf
- data file.xlsx
- Chinese Place Name.jpg
