# Supplementary material for: Extreme historical droughts and floods in the Hanjiang River Basin, China, since 1426
Source: Copernicus journal article supplement (doi:10.5194/cp-18-1775-2022), 2022-08-03
Supplement: Supplementary file 1 [file cp-18-1775-2022-supplement.zip › cp-18-1775-2022-supplement-title-page.pdf]

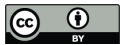

*Supplement of*

**Extreme historical droughts and floods in the Hanjiang River Basin, China, since 1426**

**Xiaodan Zhang et al.**

*Correspondence to:* Guoyu Ren ([guoyoo@cma.gov.cn](mailto:guoyoo@cma.gov.cn))

- [cp-18-1775-2022-supplement-title-page.pdf](#)
- [Chinese Place Name.jpg](#)
- [data file.xlsx](#)

The copyright of individual parts of the supplement might differ from the article licence.
