# Supplementary material for: Extreme historical droughts and floods in the Hanjiang River Basin, China, since 1426
Source: Copernicus journal article supplement (doi:10.5194/cp-18-1775-2022), 2022-08-03
Supplement: Supplementary file 1 [file cp-18-1775-2022-supplement.zip › data file.xlsx]

## Sheet: Grade of sites
Grade of sites with extreme drought/flood that occurred over Hanjing River Basin during 1426–2017.
Year	Hanzhong	Ankang	Yunxi	Nanyang	Xiangyang	Zhongxiang	Qianjiang	Wuhan
1426	4	4	4	1	1
1427	3	3	5	3
1428	4	4		3
1429				3
1430				1
1431
1432
1433						5	5
1434	2					3	3	2
1435						3	3	3
1436						2	3	3
1437						2	2	2
1438						5		3
1439						3		3
1440						2		3
1441						5		4
1442						5		4
1443						3		3
1444	5					5		3
1445	3					3		2
1446	3				4	4		4
1447	4					3		3
1448	2					4		3
1449	3					3		2
1450	5	4	5			5		3
1451						3		3
1452						3		3
1453						2	2	2
1454						2		3
1455						4		4
1456								3
1457		4	4	4	4			3
1458				3	3		5	5
1459				3	1		2	5
1460				2		1	4	1
1461				4		2	2	2
1462						3		3
1463						3		1
1464						3		1
1465						4		3
1466						3		3
1467					1	5		1
1468	2				3	4	2	2
1469	3				3	5	3	3
1470	1	2			3	5	5	3
1471	3	3			2	4	2	2
1472	3	1	2			3	3	3
1473	3	3				3	3	3
1474	1	1				1	1	2
1475	3					2	2	2
1476	3					3	3	2
1477	4					3	3	3
1478	4		1		1	5	1	1
1479	4					5
1480	5					4
1481	4					3
1482	4			5		3
1483	4					3
1484	4					4	2	5
1485	5		5			5	2	3
1486	2					3	3	3
1487	3					3	4	5
1488	2					4	3	5
1489						5	5	3
1490						4	3	4
1491		1				5	3	3
1492						4	4	3
1493	4				4	3		3
1494	3					2		2
1495	5					3		3
1496						3		3
1497						1		3
1498					2	5	5	5
1499						5	2	1
1500						3	1	1
1501						1	3	4
1502	2	2	2			4	5	2
1503	3	3	3		1	2	3	4
1504	4	4	4	1	5	3	3	3
1505	3	3	3	3	4	5	4	4
1506	3	3	3	3	3	5	2	4
1507	4	2	3	3	3	4	3	5
1508	3	2	2	4	5	5	5	5
1509	5			5	5	5	5	5
1510				4	3	2	3	2
1511				1	4	2	3
1512					3	3	5
1513					3	3	3
1514					4	3	3
1515					3	4	3
1516					1	1	1	1
1517				1		1	2	1
1518				3		3		2
1519	1	1	1	3		2		4
1520	3	3	3	1		4		3
1521	3	3	3			3		3
1522	5	5	5			4	2	2
1523	2	2	3			5	5	5
1524	3		3		2	3	3	3
1525	3		3		3	3	2	3
1526	3		2		3	2	2	2
1527	3				5	4	1	1
1528	5			5	5	5	5	5
1529	3				2	5	2	3
1530	3				3	2	2	2
1531	4				3	3	3	3
1532	2	2	2		4	4	2	4
1533	3		2		3		2	3
1534	3		2		2		3	3
1535	3		3		3		3	2
1536	1		3		3		2	3
1537	4	4	4		4	2	1	2
1538	3		1		1	4	3	4
1539	2			4	5	4	4	4
1540	3			3	3	5	3	2
1541	3			3	3	5	3	2
1542	1			2	3	3	3	3
1543			2	2	2	2	2	3
1544					3	4	5	5
1545					3	3	3	3
1546		2			2	3	1	3
1547		1			2	4	2	2
1548	4	3	2		4	3	3	3
1549	4	3	3		3	4	4	3
1550	4	2	2		3	3	2	1
1551	2				1	1	2	3
1552	3					2	2	3
1553	3			2		3	3	5
1554	1			2		5	5	4
1555				3		3	3	5
1556				3		2	2
1557				2		2	1
1558				2	1	2	2
1559				3	2	3	3
1560				2	2	1	1	2
1561					2	2	2	2
1562		4			4	2	1	4
1563		3			3	4		4
1564		3			3	3		3
1565		4	4		3	3		2
1566		3	1	1	1	2		2
1567	2	3	2	2	2	2	2	2
1568		5	4	2	2	1	1	3
1569		3	1	2	2	2	2	2
1570		4	2	3	3	4	4	4
1571		3	3	3	2	2	2	2
1572		3	3	1	2	2	3	2
1573		4	1	3	2	2	4	2
1574				2	4	4		2
1575				3	5	4		3
1576				3	2	4		2
1577				4	2	3		3
1578	2	2	2		3	3		2
1579	3	2	2		2	2		3
1580	4	3	3		3	2	2	2
1581		3	3		5	3	3	2
1582		3	3		2	5	4	5
1583		1	2	2	1	4	1	5
1584			3			5	3
1585			3			3	3
1586			4			3	2
1587	2					4	3
1588		1				5	4	4
1589				4		5	4	4
1590				4		5	3	3
1591				3		1	1	2
1592			2	2		2	4	5
1593			1	1	2	2	2	2
1594				2		3	3	2
1595	2			3		3	3	2
1596				3		3	3	2
1597				2		1	2	2
1598			1	3		3	3	3
1599			1	3		3	2	2
1600				3		3	3	3
1601				2	2	1	4	2
1602				3	3	2		2
1603				1	2	3		3
1604	4			2		3		3
1605	3			3		4		3
1606	4		2	2		3		2
1607			1	1		3		1
1608				3		2	1	1
1609				3		3	4	3
1610		4		3		2	3	4
1611		3		2		3	3	2
1612		3		3		2	2	2
1613		2	1	2		2	1	2
1614		3	3	1		4	2	2
1615		3	2				2	3
1616		3	3				3	3
1617		4	4				5	3
1618		3	3				4	4
1619		3	2	1		4	3	3
1620		3	3	3			3	2
1621	1	4	2	3			2	3
1622		3		4			1	2
1623		2					3	2
1624						2	2	2
1625						3	2	3
1626			2			3	3	3
1627	5			2		2	3	3
1628	4			4		3	3	2
1629	2			4		4	4	2
1630	2			3		3	1	3
1631	1	1	5	3		2	1	2
1632	2	3	3	1	1	2	3	1
1633	3	2	5	2	3	3	3	3
1634	3	1	3	4	3	2	4	3
1635	4	4	3	4	1	3	3	3
1636	4	4	3	4	3	2	2	4
1637	3	3	2	3	3	3	2	3
1638	1	5	5	3	3	3	3	3
1639	4	3	4	4	2	4	2	2
1640	5	5	4	5	3	5	2	5
1641		5	3	4	3	3	5	4
1642		3	3	2	3	2	2	4
1643		2	4	2	2		3	3
1644		3	3	5			5	4
1645		3	3				3	2
1646		3	3				3	3
1647	1	1	1				3	1
1648	3	3	3			4	2	3
1649	2	2	3	2	2	2	3	2
1650	3	2	2	1		3	1	2
1651	3	2	3	1		3	3	2
1652	3	2	3	5		5	5	5
1653	2	2	2	1		3	1	2
1654	3			3	2	2	2	2
1655	3			3	3	2	3	2
1656	4			3	3	2	2	5
1657	4			5	1	1	3	3
1658	2	2	2	1	2	1	2	1
1659	1	3	3	5	3	3	2	2
1660	2	3	3	2	3	3	3	1
1661	3	3	3	4	5	5	4	4
1662	1	2	1	4	2	2	1	4
1663	2	4	3	3		4	1	1
1664		3	2	2		3	2	2
1665		3	4	3		3	1	3
1666		3	3	3		4	2	3
1667		2	3	2		3	2	3
1668		3	2	3	4	3	2	4
1669		2	2	2	3	3	1	3
1670		3		2	4	5	3	2
1671		1		3	4	5	2	4
1672		2		5	3	2	1	4
1673		3		3	4	3	2	3
1674	4	3		4	3	4	5	4
1675		3		1	2	3	2	3
1676		2	2	2	2	1	1	2
1677		4	2	1	1	3	2	2
1678		3	1	5	5	4	2	3
1679	1	4	4	1	4	5	5	5
1680	3	3	3	3		5	4	3
1681	3	3	3	3		2	4	3
1682	4	2	3	2		3	3	1
1683	3	2	2	3		2	3	1
1684	4	5	4	5		4	3	4
1685	3			2		4	2	2
1686	3			3		4	3	3
1687	3			2		3	3	3
1688	1			2		3	3	3
1689	3		4	5		4	2	5
1690	4	5	4	5	4	4		4
1691	5	5	5	2		2		2
1692	5	4	5	3		4		4
1693	4	1	3	5		2		2
1694			2	3		3	2	4
1695			2	1		3	3	3
1696			3			2	2	2
1697			3			3	2	3
1698		4	4			3	3	4
1699			4			4	4	4
1700			4				2
1701			2				3
1702				1			2
1703	2	4		3	2		2
1704	3	3		5	3		2	4
1705	3	3		4	3	2	2	2
1706	1	2	4	3	2	2	2	2
1707	3		2	2	3	2	3	4
1708	3		4	2	3	3	2	4
1709	2			2	1	3	2	2
1710	3				4	2		3
1711	3					3		4
1712	3					3		4
1713	4					3		3
1714		2	1			4	2	4
1715						3	2	2
1716						3	2	2
1717						3	3	3
1718	2					4	4	4
1719	3				2	3	3	3
1720	5				3	3	1	2
1721	4		5	5	4	3	3	3
1722	4		4	4	4	4	4	4
1723			2	3	3	3	3	3
1724		2	1	2	1	2	2	3
1725		1	4	3		3	3	3
1726		3	3	3		3	1	2
1727		3	3	3		2	1	1
1728		2	2	2		3	2	2
1729				3		3	3
1730				2		4	2
1731						3	2
1732					2	2	2
1733					3	3	1
1734					2	3	3
1735			1	2	3	4	3	4
1736	2		4	2	1	2	2	2
1737	3		3	3	3	3	2	2
1738	2		3	3	4	4	4	4
1739	3		3	2	2	4	5	4
1740	4		2	2	3	2	1	2
1741			3	3	2	2	1	2
1742			1	3	1	1	1	1
1743			2	2	3	4	2	3
1744		2	3	3	3	2	3	3
1745			4	3	2	1	2	2
1746			3	2	1	3		3
1747			3	3	2	4		4
1748			2	3	3	3		3
1749	2		2	1	1	3		3
1750	3		3	3	3	3	4	4
1751	3		3	3	1	4
1752	4	4	4	2	5	4
1753				3	3	3
1754				2	3	3
1755				2	2	2		5
1756					1		5	3
1757					3			2
1758					3			3
1759			1		4			2
1760								3
1761						1		3
1762						3		3
1763		2				3		4
1764			4			4		2
1765						3	2	2
1766						3	3	3
1767						2	3	1
1768					5	5	5	4
1769					3	3	1	1
1770	4	1	2		2	3		3
1771	3	3	3		3	4		3
1772	3	3	3		3	3		3
1773	2	2	3	2	3	3		3
1774			3		4	4		4
1775			4		4	4		3
1776			3		3	3	5	3
1777			3		3	3	5	3
1778		4	1		4	5	5	5
1779		3	3	2		4	3	4
1780		5	3	3		3	3	3
1781		3	2	3		4	2	4
1782		3	3	4		4	3	4
1783		3	4	3		3	3	3
1784	5	4	3	4	2	3	3	5
1785	3	5	5	5	5	4	5	5
1786	3	3	2	1	3	4	4	2
1787	2	3	1		3	3	3	3
1788	3	4	3		2	1	1	1
1789	2		3			3
1790			3			3
1791			1			3
1792			4			4
1793			3			2
1794		1	2		2	1		2
1795		2			5	2		3
1796		3			2	1	2	4
1797		4			2			3
1798		3						3
1799		2						3
1800	2	4	4					1
1801	3	2	3					3
1802	2	4	2	2		4	2	4
1803	3	2	3	5		2	3	3
1804	3	4	3	4		3	3	3
1805	3	3	3	3		1	2	1
1806	4	2	2	3		2	3	3
1807	3	3	3	2		5	4	4
1808	2	3	3	3		3	2	3
1809	2	3	2	3	2	3		3
1810	1	2	3	3	3	2		5
1811	2	3	5	4	2	4		3
1812	3	1	2	2	3	4		3
1813	5	5	4	5	5	4	2	3
1814	4	4	3	4	3	4	4	5
1815	3		3	3	3		3	2
1816	2			2	2		2	2
1817	3			3	3		3	3
1818	2			2	3		3	3
1819	2	2		3	2	4	2	4
1820	3	2		3	3	2	4	4
1821	3	2	2	3	3	2	3	3
1822	2	3	2	2	1	1	3	2
1823	2	2	3	2	3	4	2	2
1824	2	2	4	3	2	4	4	4
1825	3	3	3	3	3	4	2	2
1826	3	1	3	2	4	1	2	2
1827	1	3	2			3	2	2
1828	3	3	3			3	3	3
1829	3	2	3			4	3	3
1830	1	3	3			3	3	3
1831	3	3	2		2	1	1	1
1832	3	1	1	1	1	1	2	2
1833	2	4	4	4	1	2	4	2
1834	4	2	3	3	4	3	1	4
1835	1	2	4	3	4	4	4	4
1836	4	2	4	3	4	2	3	4
1837	3	3	3	4		2	3	2
1838	3	3	3	3		4	4	4
1839	3	2	4	2		3	3	2
1840	2	3	3	4		3	2	2
1841	3	4	3	3		4	2	2
1842	2	3	3	3		3	2	2
1843	1	1	4	4		4	4	4
1844	3	3	4	4	5	3	3	3
1845	3	3	3	3	2	3	3	3
1846	2	2	5	4	3	4	3	4
1847	1		4	3	4	4	1	4
1848	3		1	2	1	1	2	1
1849	2		3	4	3	1	1	1
1850	3		3	3	3	2	2	2
1851	2		3	2	2	1	2	2
1852	2	1	1	1	1	1	2	4
1853	2	2	2	2	2	2	3	2
1854	2	3	4	3	3	3	5	2
1855	3	3	3	3	1	1	5	1
1856	3	5	5	5	5	5	5	5
1857	2	4	4	3	4	2	4	2
1858		1		3	3	2	4	4
1859		3		4	3	4	1	4
1860		4		3	4	3	2	2
1861		3		3	4	2	2	3
1862	5	2	2	3	3	2	5	4
1863	2	3	2	2	2	2	2	2
1864	4	1	1	4	3	3	4	5
1865	3	3	1	4	3	3	2	1
1866	4	4	4	2	3	2	1	4
1867	1	4	3	1	4	1	2	4
1868	1	3	2	3	3	1	2	2
1869	3	1	3	3	3	2	2	3
1870	1	2	1	4	5	1	2	1
1871	4	3	2	2	1	2	2	2
1872	5	2		3	2		3	3
1873	2	3		3	3		2	3
1874	1	3		5	4		2	1
1875	1	4		3	4		3	2
1876	3	3		4	4		4	2
1877	5	5	5	5	5	5	5	5
1878	4	2	4	4	5		4	1
1879	3	3	3	3	3		4	3
1880	2	3	2	4	3		3	3
1881	5	2	2		3		3	2
1882	2	3	2		4		2	3
1883	2	1	3		3	2	1	2
1884	1	2	2		3	3	2	3
1885	3	1	3		3	2	2	2
1886	3	3	3	2	4	4	2	4
1887	1	3	2	3	2	2	1	1
1888	2	3	3	3	2	4	3	3
1889	2	1	2	2	1	1	1	1
1890	2	2	2	3	3	3	3	4
1891	3	4	3	3	4	4	4	2
1892	3	3	2	3		3	3	3
1893	2	3	3	2		3	3	3
1894	2	3	3	4		3	2	3
1895	2	4	2	3		1	1	4
1896	4	5	5	2		4	1	3
1897	2	2	3	2		1	1	1
1898	1	3	2	2	5	2	2	2
1899	4	3	4	3	2	3	4	4
1900	5	5	5	4	4	4		3
1901	3	3	3	2	3	3		5
1902	2	2	3	5	2	3		3
1903	2	1	3	3	3	2		2
1904	1	3	4	3	3	3		3
1905	3	3	3	2	3	3		3
1906	2	2	2	1	1	3		3
1907	3	3	3	5	2	2	2	2
1908	3	4	3	3	2	2	1	1
1909	3	4	2	1	2	2	1	1
1910	2			2	3	1	1	2
1911	3			3	3	1	2	2
1912	1			1	4	2	2	3
1913	3			3	4	4	2	2
1914	3			4	5	5	2	5
1915	3			3	3	3	3	5
1916	5			3	3	3	1	4
1917	3			3	3	3	2	1
1918	3			4	5	2	3	2
1919	2	4	2	1	1	2	1	1
1920	5	5	5	5	3	3	2	3
1921	1	2	3	1	1	1	1	1
1922	3	3	3	4	2	1	2	1
1923	2	2	2	3	3	3	3	2
1924	3	4	1	2	1	1	2	1
1925	2	5	3	3	3	2	2	5
1926	3	3	3	3	5	1	1	1
1927	3	3	3	3	4	3	4	1
1928	4	5	5	5	5	5	5	5
1929	3	5	3	5	3	3	3	3
1930	5	5	1	3	3	2	2	3
1931	1	1	1	1	1	1	1	1
1932	2	2	2	4	4	5	4	5
1933	1	2	1	2	3	1	1	1
1934	2	1	4	2	2	4	4	5
1935	5	5	1	1	1	2	4	4
1936	3	4	4	5	4	5	4	1
1937	4	5	3		2	2	2	2
1938	3	3	3		2	2	2	2
1939	4	4	3		3	2	3	2
1940	1	4	4		3	2	3	3
1941	4	4	4	4	5	5	2	4
1942	4	5	5	5	5	5	4	5
1943	1	3	3	4	2	2	3	3
1944	4	4	5	4	5	5	4	5
1945	4	5	4	3	3	2	1	4
1946	3	3	3	3	3	1	2	2
1947	3	4	5	4	4	2	2	2
1948	3	3	2	3	3	2	2	2
1949	1	2	2	3	3	1	2	2
1950	3	5	4	4	2	1	2	2
1951	4	2	2	2	4	2	2	2
1952	1	1	3	2	4	5	5	4
1953	4	4	4	1	2	4	4	3
1954	4	2	1	1	2	1	1	1
1955	3	2	2	1	4	3	4	2
1956	1	2	2	3	3	3	2	4
1957	4	5	3	3	4	4	4	2
1958	2	2	1	4	2	3	4	3
1959	5	5	5	3	4	5	4	3
1960	5	2	3	3	4	3	4	4
1961	3	5	5	5	5	4	4	4
1962	3	5	2	4	3	2	2	1
1963	1	2	3	1	1	4	4	3
1964	3	2	1	2	2	4	2	3
1965	4	4	4	4	3	4	4	4
1966	4	5	5	4	5	5	5	5
1967	4	3	3	3	1	3	3	4
1968	3	3	4	2	4	2	3	4
1969	4	4	4	4	3	2	2	1
1970	4	4	2	4	3	2	1	2
1971	4	4	3	2	2	3	5	5
1972	4	5	4	4	4	5	4	5
1973	2	4	4	3	3	2	2	2
1974	3	1	2	5	4	4	3	4
1975	3	3	4	4	3	4	3	3
1976	4	5	5	4	4	5	4	4
1977	5	3	4	3	4	3	4	4
1978	4	3	5	5	4	4	4	4
1979	4	1	1	1	1	3	2	3
1980	2	2	2	2	2	1	1	1
1981	1	3	3	3	5	5	4	4
1982	2	2	2	3	3	2	3	1
1983	1	1	3	3	2	1	1	1
1984	2	1	1	1	2	3	5	3
1985	3	3	3	4	4	3	3	4
1986	5	4	4	3	4	3	2	4
1987	2	1	3	3	3	2	3	3
1988	4	3	3	3	4	3	2	1
1989	2	3	2	1	2	3	2	2
1990	3	3	3	4	4	4	4	3
1991	5	2	3	3	4	2	2	1
1992	4	4	3	4	3	3	3	3
1993	4	4	3	3	3	3	3	2
1994	5	5	4	4	4	3	4	3
1995	5	3	5	3	3	5	3	3
1996	4	2	3	1	2	1	1	2
1997	5	5	2	4	5	3	3	4
1998	2	4	4	1	2	1	1	1
1999	4	5	5	4	5	4	3	2
2000	3	1	1	1	1	2	1	3
2001	4	4	5	4	5	5	5	5
2002	4	4	3	3	3	2	4	3
2003	3	1	1	2	4	3	3	3
2004	4	3	1	3	2	3	1	1
2005	4	2	1	1	2	3	3	3
2006	4	5	2	4	5	3	4	4
2007	3	2	3	3	1	1	5	4
2008	3	1	3	3	1	1	2	2
2009	3	3	3	3	3	3	3	4
2010	3	1	1	1	2	4	2	2
2011	1	1	3	4	4	4	2	3
2012	2	2	3	4	5	5	3	2
2013	1	4	3	2	2	1	1	1
2014	4	3	3	4	3	5	5	4
2015	4	3	4	4	4	4	2	3
2016	5	4	4	3	4	1	2
2017	4	2	1	3	1	3	3	4

## Sheet: Frequency  per decade
The frequency of extreme drought and flood in Hanjiang River Basin for each decade from 1430s to 2000s.
Decade	Extreme drought	Extreme flood	Extreme drought and flood
1430s	1	0	1
1440s	3	0	3
1450s	2	0	2
1460s	0	1	1
1470s	1	1	2
1480s	3	0	3
1490s	1	0	1
1500s	1	1	2
1510s	0	3	3
1520s	2	0	2
1530s	0	0	0
1540s	1	0	1
1550s	0	1	1
1560s	0	3	3
1570s	0	0	0
1580s	0	0	0
1590s	0	2	2
1600s	0	2	2
1610s	1	1	2
1620s	0	0	0
1630s	0	1	1
1640s	2	1	3
1650s	1	3	4
1660s	0	0	0
1670s	1	2	3
1680s	2	0	2
1690s	2	0	2
1700s	0	0	0
1710s	0	0	0
1720s	0	1	1
1730s	0	0	0
1740s	0	1	1
1750s	0	0	0
1760s	1	0	1
1770s	1	0	1
1780s	1	0	1
1790s	0	0	0
1800s	0	0	0
1810s	1	0	1
1820s	0	1	1
1830s	0	2	2
1840s	0	1	1
1850s	1	1	2
1860s	0	0	0
1870s	1	1	2
1880s	0	3	3
1890s	0	1	1
1900s	1	2	3
1910s	1	2	3
1920s	1	2	3
1930s	0	3	3
1940s	3	0	3
1950s	1	1	2
1960s	2	0	2
1970s	3	1	4
1980s	0	2	2
1990s	2	2	4
2000s	1	1	2

## Sheet: Percentage of sites
Percentage of sites with extreme drought/flood that occurred over Hanjing River Basin during 1426–2017.
Year	Grade 5	Grade 4	Grade 2	Grade 1
1426		0.6		0.4
1427	0.25
1428
1429
1430				1
1431
1432
1433	1
1434			0.5
1435
1436			0.33
1437			1
1438	0.5
1439
1440		0.5
1441	0.5	0.5
1442	0.5	0.5
1443
1444	0.8
1445			0.33
1446		0.75
1447		0.33
1448		0.33	0.33
1449			0.33
1450	0.6	0.2
1451
1452
1453			1
1454			0.5
1455		1
1456
1457		0.8
1458	0.8
1459	0.25		0.25	0.25
1460			0.4	0.6
1461		0.25	0.75
1462
1463				0.5
1464				0.5
1465		0.5
1466
1467	0.33			0.67
1468		0.2	0.6
1469	0.2
1470	0.33		0.17	0.17
1471		0.17	0.5
1472			0.17	0.17
1473
1474			0.2	0.8
1475			0.75
1476			0.25
1477		0.25
1478	0.17	0.17		0.67
1479	0.5	0.5
1480	0.5	0.5
1481		0.5
1482	0.33	0.33
1483		0.5
1484	0.25	0.5
1485	0.6	0.2
1486		0.25
1487	0.25	0.25
1488	0.25	0.25	0.25
1489	0.8
1490		0.67
1491	0.25			0.25
1492		0.67
1493		0.5
1494			0.67
1495
1496
1497				0.5
1498	0.75
1499	0.33		0.33	0.33
1500				0.75
1501		0.33		0.33
1502	0.17	0.17	0.67
1503		0.14	0.14	0.14
1504	0.13	0.38		0.13
1505	0.13	0.38
1506	0.13	0.13	0.13
1507	0.13	0.25	0.13
1508	0.5	0.13	0.25
1509	1
1510		0.2	0.4
1511		0.25	0.25	0.25
1512	0.33
1513
1514		0.33
1515		0.33
1516				1
1517			0.25	0.75
1518			0.33
1519			0.33	0.5
1520		0.17		0.17
1521
1522	0.5	0.33
1523	0.5		0.33
1524			0.17
1525			0.17
1526			0.67
1527	0.2	0.2		0.4
1528	1
1529	0.2		0.4
1530			0.6
1531		0.2
1532		0.43	0.57
1533			0.4
1534			0.4
1535			0.2
1536			0.2	0.2
1537		0.57	0.29
1538		0.33		0.33
1539	0.17	0.67	0.17
1540	0.17		0.17
1541	0.17		0.17
1542			0.17	0.17
1543			0.83
1544	0.75
1545
1546			0.4	0.2
1547		0.17	0.5	0.17
1548		0.29	0.14
1549		0.43
1550		0.14	0.43	0.14
1551			0.4	0.4
1552			0.5
1553	0.2		0.2
1554	0.4	0.2	0.2	0.2
1555	0.25
1556			0.67
1557			0.67	0.33
1558			0.75	0.25
1559			0.25
1560			0.6	0.4
1561			1
1562		0.6	0.2	0.2
1563		0.5
1564
1565		0.4	0.2
1566			0.33	0.5
1567			0.88
1568	0.14	0.14	0.29	0.29
1569			0.71	0.29
1570		0.59	0.14
1571			0.59
1572			0.43	0.14
1573		0.29	0.43	0.14
1574		0.5	0.5
1575	0.25	0.25
1576		0.25	0.5
1577		0.25	0.25
1578			0.67
1579			0.67
1580		0.14	0.43
1581	0.17		0.17
1582	0.33	0.17	0.17
1583	0.14	0.14	0.29	0.43
1584	0.33
1585
1586		0.33	0.33
1587		0.33	0.33
1588	0.25	0.5		0.25
1589	0.25	0.75
1590	0.25	0.25
1591			0.25	0.5
1592	0.2	0.2	0.6
1593			0.67	0.33
1594			0.5
1595			0.4
1596			0.25
1597			0.75	0.25
1598				0.2
1599			0.4	0.2
1600
1601		0.2	0.6	0.2
1602			0.5
1603			0.25	0.25
1604		0.25	0.25
1605		0.25
1606		0.25	0.75
1607				0.75
1608			0.25	0.5
1609		0.25
1610		0.4	0.2
1611			0.4
1612			0.6
1613			0.67	0.33
1614		0.17	0.33	0.17
1615			0.5
1616
1617	0.5	0.25
1618		0.5
1619		0.17	0.17	0.17
1620				0.2
1621		0.17	0.33	0.17
1622		0.25	0.25	0.25
1623			0.67
1624			1
1625			0.33
1626			0.25
1627	0.2		0.4
1628		0.4	0.2
1629		0.75	0.25
1630			0.25	0.25
1631	0.14		0.43	0.43
1632			0.25	0.38
1633	0.13		0.25
1634	0.13	0.25	0.13
1635		0.38		0.13
1636		0.5	0.25
1637			0.25
1638	0.25			0.13
1639		0.5	0.38
1640	0.63	0.25	0.13
1641	0.29	0.29
1642		0.14	0.43
1643		0.17	0.5
1644	0.4	0.4
1645			0.25
1646
1647				0.8
1648		0.17	0.17
1649			0.75
1650			0.59	0.29
1651			0.29	0.14
1652	0.59	0.29
1653			0.59	0.29
1654			0.67
1655			0.33
1656	0.17	0.17	0.33
1657	0.17	0.17		0.33
1658			0.5	0.5
1659	0.13		0.25	0.13
1660			0.25	0.13
1661	0.25	0.38
1662		0.25	0.38	0.38
1663		0.29	0.14	0.29
1664			0.67
1665		0.17		0.17
1666		0.17	0.17
1667			0.33
1668		0.25	0.25
1669			0.43	0.14
1670	0.2	0.2	0.4
1671		0.4	0.2	0.2
1672	0.2		0.4	0.2
1673		0.2	0.2
1674	0.29	0.59
1675			0.33	0.17
1676			0.71	0.29
1677		0.14	0.43	0.43
1678	0.29		0.14	0.14
1679	0.38	0.38		0.25
1680	0.14	0.14
1681		0.14	0.14
1682		0.14	0.29	0.14
1683			0.43	0.14
1684	0.29	0.59
1685		0.2	0.6
1686		0.2
1687			0.2
1688			0.2	0.2
1689	0.5	0.33	0.17
1690	0.29	0.71
1691	0.5		0.5
1692	0.33	0.5
1693	0.17	0.17	0.33	0.17
1694		0.2	0.4
1695			0.2	0.2
1696			0.75
1697			0.25
1698		0.6
1699		1
1700		0.5	0.5
1701			0.5
1702			0.5	0.5
1703		0.2	0.6
1704	0.2	0.2
1705		0.14	0.43
1706		0.13	0.63	0.13
1707		0.14	0.43
1708		0.29	0.29
1709			0.67	0.17
1710		0.25	0.25
1711		0.33
1712		0.33
1713		0.33
1714		0.4	0.4	0.2
1715			0.67
1716			0.67
1717
1718		0.75	0.25
1719			0.2
1720	0.2		0.2	0.2
1721	0.29	0.29
1722		1
1723			0.17
1724			0.59	0.29
1725		0.17		0.17
1726			0.17	0.17
1727			0.17	0.33
1728			0.5
1729
1730		0.33	0.67
1731			0.5
1732			1
1733				0.2
1734			0.2
1735		0.33	0.17	0.17
1736		0.14	0.71	0.14
1737			0.29
1738		0.59
1739	0.14	0.29	0.29
1740		0.14	0.59
1741			0.5	0.17
1742				0.83
1743		0.17	0.5
1744			0.29
1745		0.17	0.5	0.17
1746			0.2	0.2
1747		0.4	0.2
1748			0.2
1749			0.33	0.33
1750		0.29
1751		0.2		0.2
1752	0.17	0.67	0.17
1753
1754			0.33
1755	0.25		0.75
1756	0.33			0.33
1757			0.5
1758
1759		0.33	0.33	0.33
1760
1761				0.5
1762
1763		0.33	0.33
1764		0.67	0.33
1765			0.67
1766
1767			0.33	0.33
1768	0.75	0.25
1769				0.5
1770		0.17	0.33	0.17
1771		0.17
1772
1773			0.43
1774		0.75
1775		0.75
1776	0.2
1777	0.2
1778	0.5	0.33		0.17
1779		0.33	0.17
1780	0.17
1781		0.33	0.33
1782		0.5
1783		0.17
1784	0.25	0.25	0.13
1785	0.75	0.13
1786		0.25	0.25	0.13
1787			0.14	0.14
1788		0.14	0.14	0.43
1789			0.33
1790
1791				0.5
1792		1
1793			0.5
1794			0.6	0.4
1795	0.25		0.5
1796		0.2	0.4	0.2
1797		0.33	0.33
1798
1799			0.5
1800		0.5	0.25	0.25
1801			0.25
1802		0.43	0.59
1803	0.14		0.29
1804		0.29
1805	0.29		0.14
1806		0.14	0.43
1807	0.14	0.29	0.14
1808			0.29
1809			0.43
1810	0.14		0.29	0.14
1811	0.14	0.29	0.29
1812		0.14	0.29	0.14
1813	0.5	0.25	0.13
1814	0.13	0.63
1815			0.17
1816			1
1817
1818			0.4
1819		0.29	0.59
1820		0.29	0.29
1821			0.38
1822			0.5	0.25
1823		0.13	0.63
1824		0.5	0.38
1825		0.13	0.25
1826		0.13	0.38	0.25
1827			0.5	0.13
1828
1829		0.17	0.17
1830				0.17
1831			0.43	0.43
1832			0.25	0.63
1833		0.5	0.38	0.13
1834		0.38	0.13	0.13
1835		0.63	0.13	0.13
1836		0.5	0.25
1837		0.14	0.29
1838		0.43
1839		0.14	0.43
1840		0.14	0.43
1841		0.29	0.29
1842			0.43
1843		0.71		0.29
1844	0.13	0.25
1845			0.13
1846	0.13	0.38	0.25
1847		0.59		0.29
1848			0.29	0.59
1849		0.14	0.14	0.43
1850			0.5
1851			0.71	0.14
1852		0.13	0.25	0.63
1853			0.88
1854	0.13	0.13	0.25
1855	0.13			0.38
1856	0.88
1857		0.5	0.38
1858		0.25	0.13	0.13
1859		0.5		0.17
1860		0.33	0.33
1861		0.13	0.25
1862	0.25	0.13	0.38
1863			0.88
1864	0.13	0.38		0.25
1865		0.13	0.13	0.25
1866		0.5	0.25	0.13
1867		0.38	0.13	0.38
1868			0.38	0.25
1869			0.25	0.13
1870	0.13	0.13	0.25	0.5
1871		0.13	0.63	0.13
1872	0.17		0.33
1873			0.33
1874	0.17	0.17		0.33
1875		0.33	0.17	0.17
1876		0.5	0.17
1877	1
1878	0.14	0.59	0.14	0.14
1879		0.14
1880		0.14	0.14
1881	0.17		0.5
1882		0.17	0.5
1883			0.59	0.29
1884			0.43	0.14
1885			0.43	0.14
1886		0.38	0.25
1887			0.5	0.38
1888		0.13	0.25
1889			0.38	0.63
1890		0.13	0.38
1891		0.5	0.13
1892			0.14
1893			0.29
1894		0.14	0.29
1895		0.29	0.29	0.29
1896	0.29	0.29	0.14	0.14
1897			0.43	0.43
1898	0.13		0.63	0.13
1899		0.5	0.13
1900	0.43	0.43
1901	0.14		0.14
1902	0.14		0.43
1903			0.43	0.14
1904		0.14		0.14
1905			0.14
1906			0.59	0.29
1907	0.13		0.5
1908		0.13	0.25	0.25
1909		0.13	0.5	0.38
1910			0.5	0.33
1911			0.33	0.17
1912		0.17	0.33	0.33
1913		0.33	0.33
1914	0.5	0.33
1915	0.17
1916	0.17	0.17		0.17
1917				0.17
1918	0.17	0.17	0.33
1919		0.13	0.38	0.5
1920	0.5		0.13
1921			0.13	0.75
1922		0.13	0.25	0.25
1923			0.5
1924		0.13	0.25	0.5
1925	0.25		0.38
1926	0.13			0.38
1927		0.25		0.13
1928	0.88	0.13
1929	0.25
1930	0.25		0.25	0.13
1931				1
1932	0.25	0.38	0.38
1933			0.25	0.63
1934	0.13	0.38	0.38	0.13
1935	0.13	0.13		0.75
1936	0.25	0.5		0.13
1937	0.14	0.14	0.59
1938			0.59
1939		0.29	0.29
1940		0.29	0.14	0.14
1941	0.25	0.63	0.13
1942	0.75	0.25
1943		0.13	0.25	0.13
1944	0.5	0.5
1945	0.13	0.38	0.13	0.13
1946			0.25	0.13
1947	0.13	0.38	0.38
1948		0.5
1949			0.5	0.25
1950	0.13	0.25	0.38	0.13
1951		0.25	0.75
1952	0.25	0.25	0.13	0.25
1953		0.5	0.13	0.13
1954		0.13	0.25	0.63
1955		0.25	0.38	0.13
1956		0.13	0.38	0.13
1957	0.13	0.5	0.13
1958		0.25	0.38	0.13
1959	0.5	0.25
1960	0.13	0.38	0.13
1961	0.5	0.38
1962	0.13	0.13	0.38	0.13
1963		0.25	0.13	0.38
1964		0.13	0.5	0.13
1965		0.88
1966	0.75	0.25
1967		0.25		0.13
1968		0.38	0.25
1969		0.5	0.25
1970		0.38	0.38	0.13
1971	0.25	0.25	0.25
1972	0.38	0.63
1973		0.25	0.5
1974	0.13	0.38	0.13	0.13
1975		0.38
1976	0.38	0.63
1977	0.13	0.5
1978	0.25	0.63
1979		0.13	0.25	0.5
1980			0.63	0.38
1981	0.25	0.25		0.13
1982			0.5	0.13
1983			0.13	0.63
1984	0.13		0.25	0.38
1985		0.38
1986	0.13	0.5	0.13
1987			0.25	0.13
1988		0.25	0.13	0.13
1989			0.63	0.13
1990		0.5
1991	0.13	0.13	0.38	0.13
1992		0.38
1993		0.25	0.13
1994	0.25	0.5
1995	0.38
1996		0.13	0.5	0.38
1997	0.38	0.25	0.13
1998		0.25	0.25	0.5
1999	0.38	0.5	0.13
2000			0.13	0.63
2001	0.63	0.38
2002		0.38	0.13
2003		0.13	0.13	0.25
2004		0.13	0.13	0.38
2005		0.13	0.25	0.25
2006	0.25	0.5	0.13
2007	0.13	0.13	0.13	0.25
2008			0.25	0.38
2009		0.13
2010		0.13	0.5	0.38
2011		0.38	0.13	0.25
2012	0.25	0.13	0.38
2013		0.13	0.25	0.5
2014	0.25	0.38
2015		0.63	0.13
2016	0.14	0.43	0.14	0.14
2017		0.25	0.13	0.25
