# Supplementary figures and images for: Extreme historical droughts and floods in the Hanjiang River Basin, China, since 1426
Source: Copernicus journal article supplement (doi:10.5194/cp-18-1775-2022), 2022-08-03

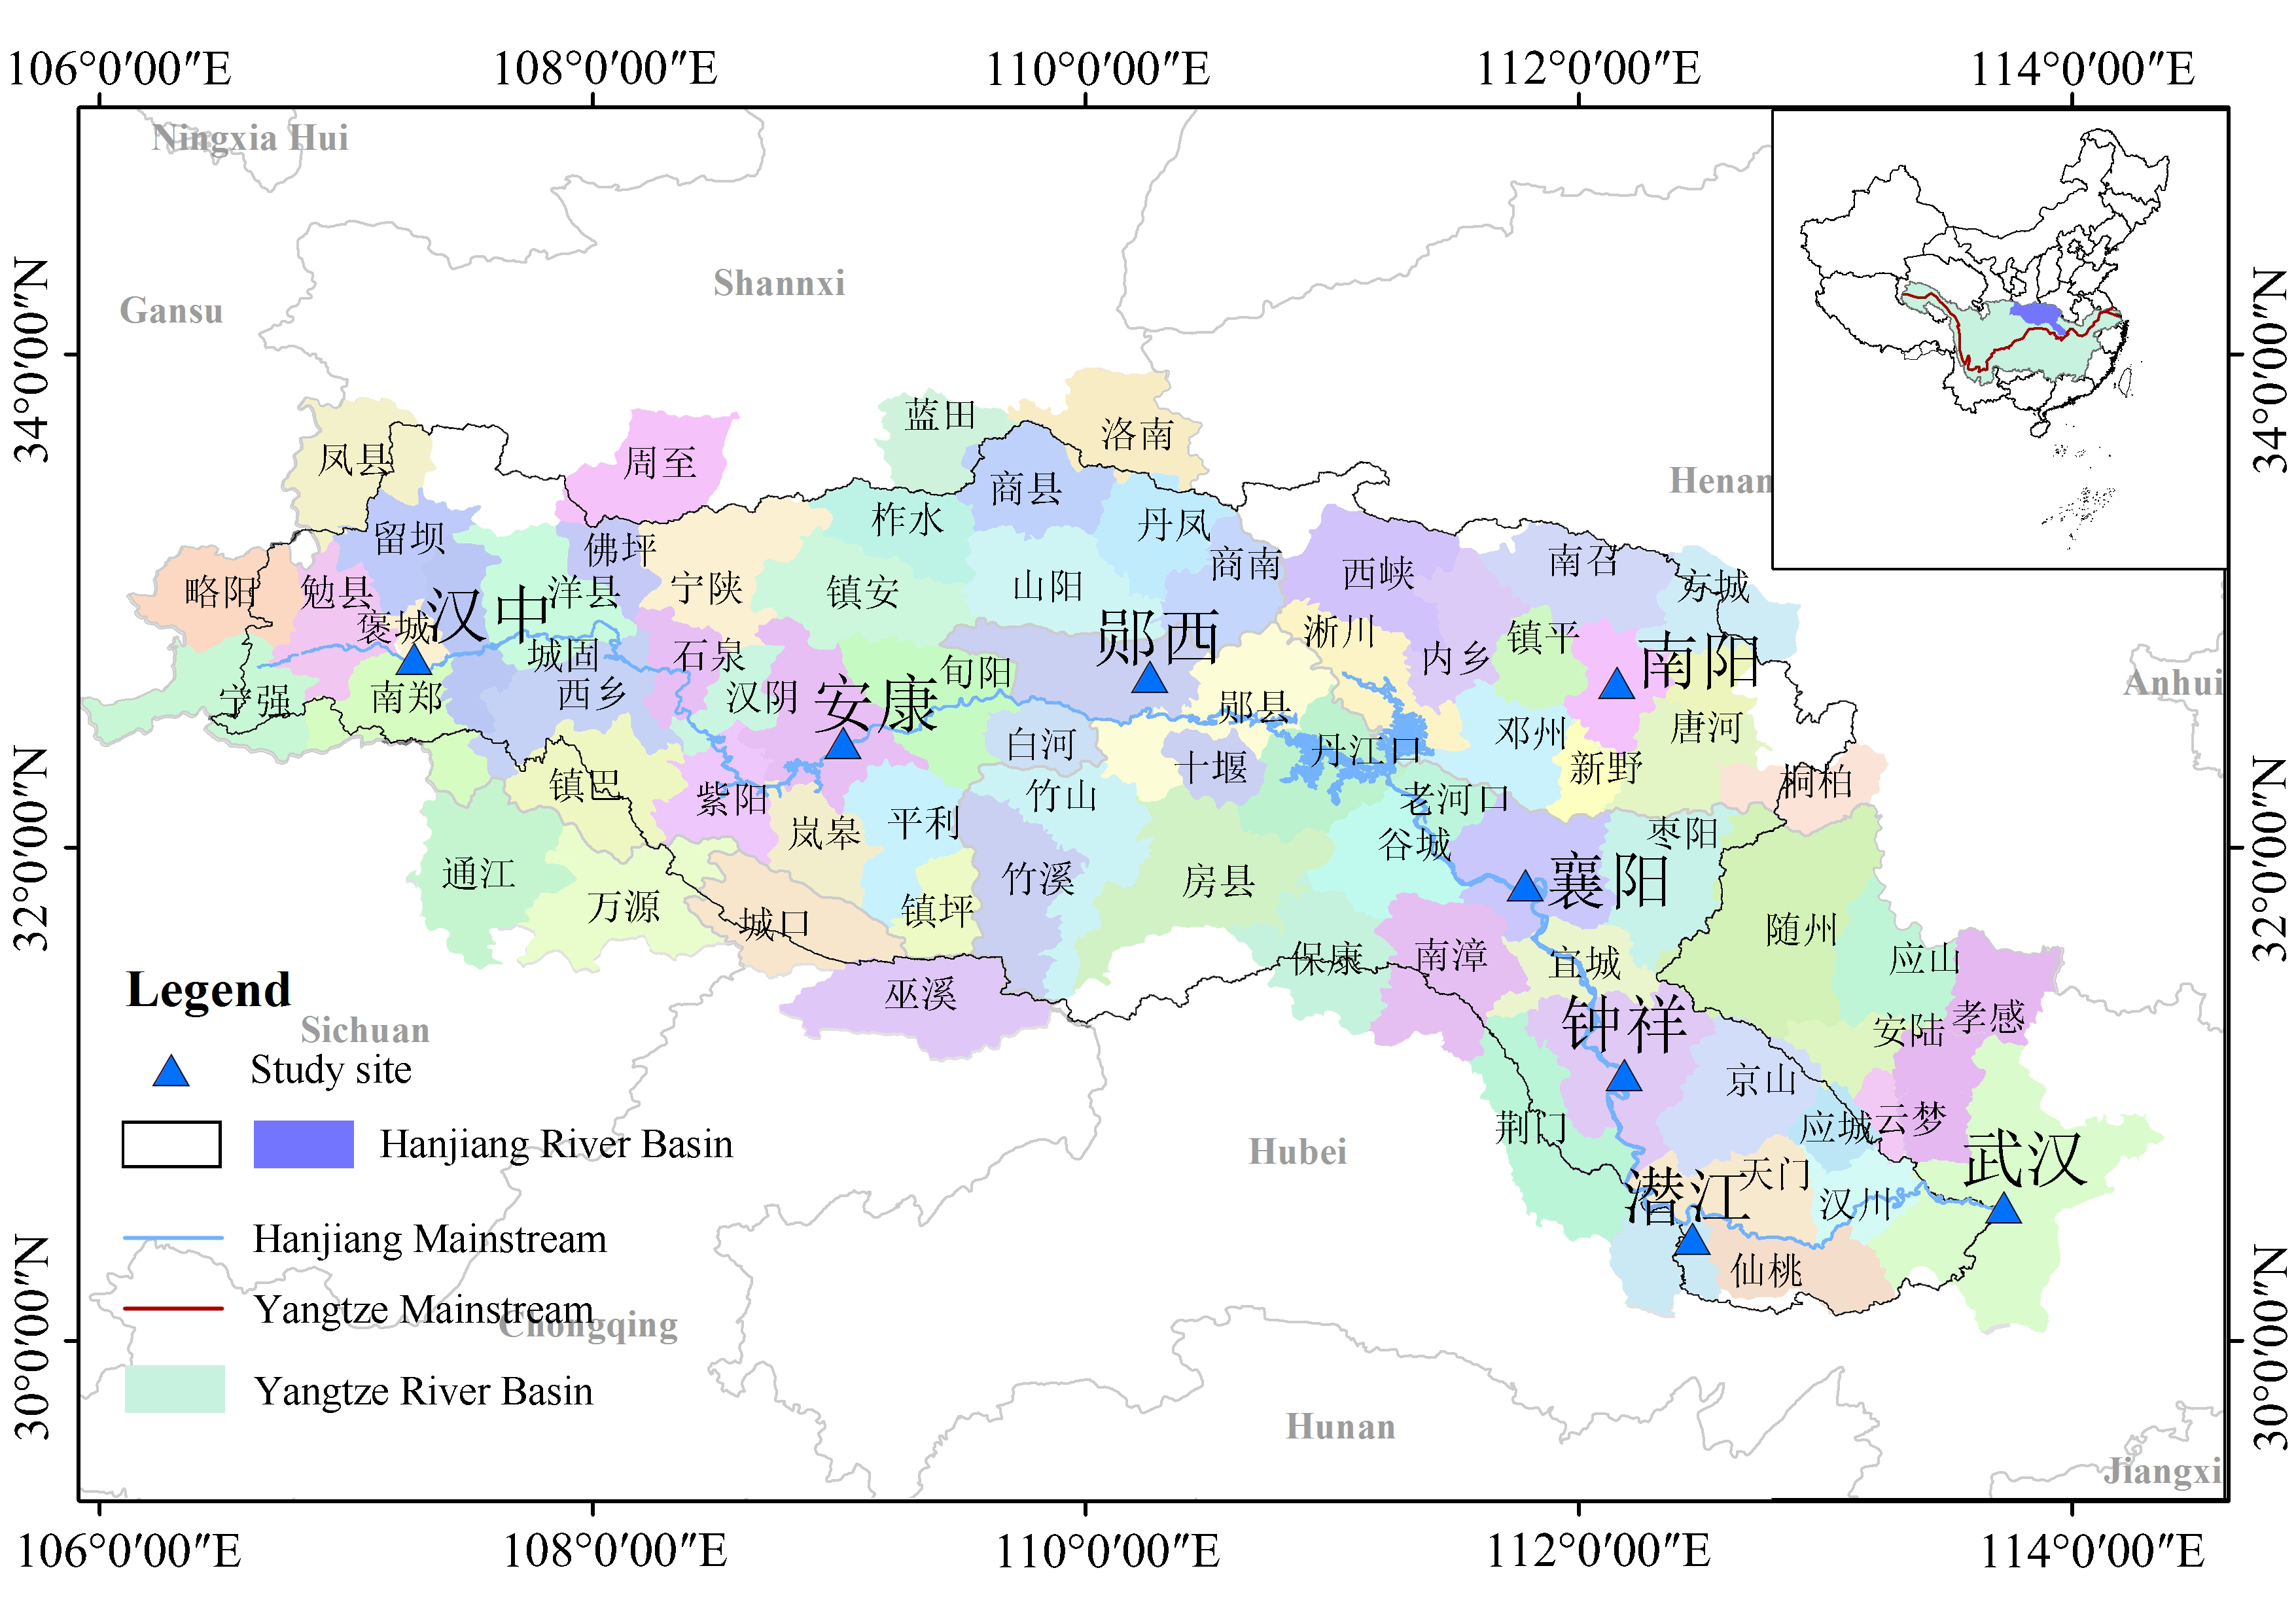

Supplement: Supplementary file 1 [file cp-18-1775-2022-supplement.zip › Chinese Place Name.jpg]
